# Supplementary material for: Scandium: An efficient dopant to modulate the optical spectrum of vanadium dioxide (VO2)
Source: Springer Nature journal article supplement (doi:10.1007/s42452-020-03332-7), 2020-08-25
Supplement: MOESM1 [file 42452_2020_3332_MOESM1_ESM.doc]

**SUPPLEMENTARY INFORMATION**

**Scandium: An efficient dopant to modulate the optical spectrum of vanadium dioxide (VO2)**

Devanshi Bhardwaj*, A. M. Umarji

Materials Research Centre, Indian Institute of Science, Bengaluru, India - 560012

*[devanshib@iisc.ac.in](mailto:devanshib@iisc.ac.in)


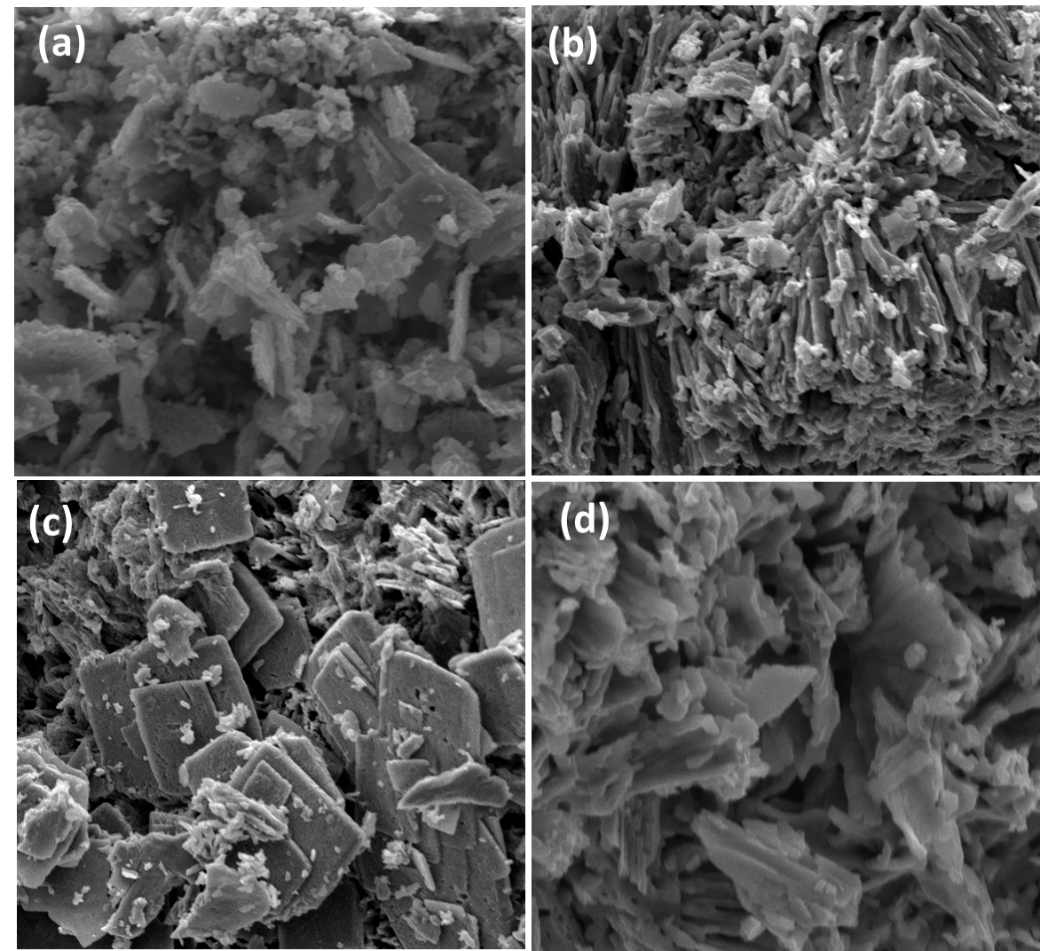


Figure S1: SEM images of (a) BV, (b) BVS1.0, (c) BVS2.0 and (d) BVS6.25 samples.


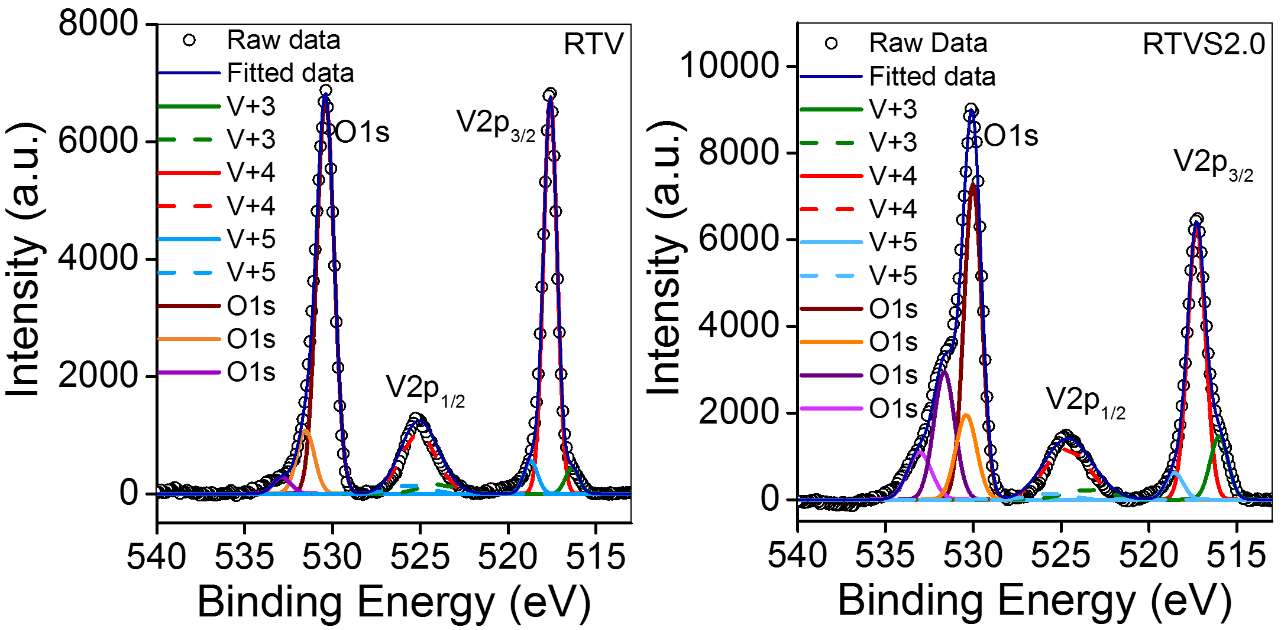


Figure S2: V2p and O1s spectra for RTV and RTVS2.0 thin films.


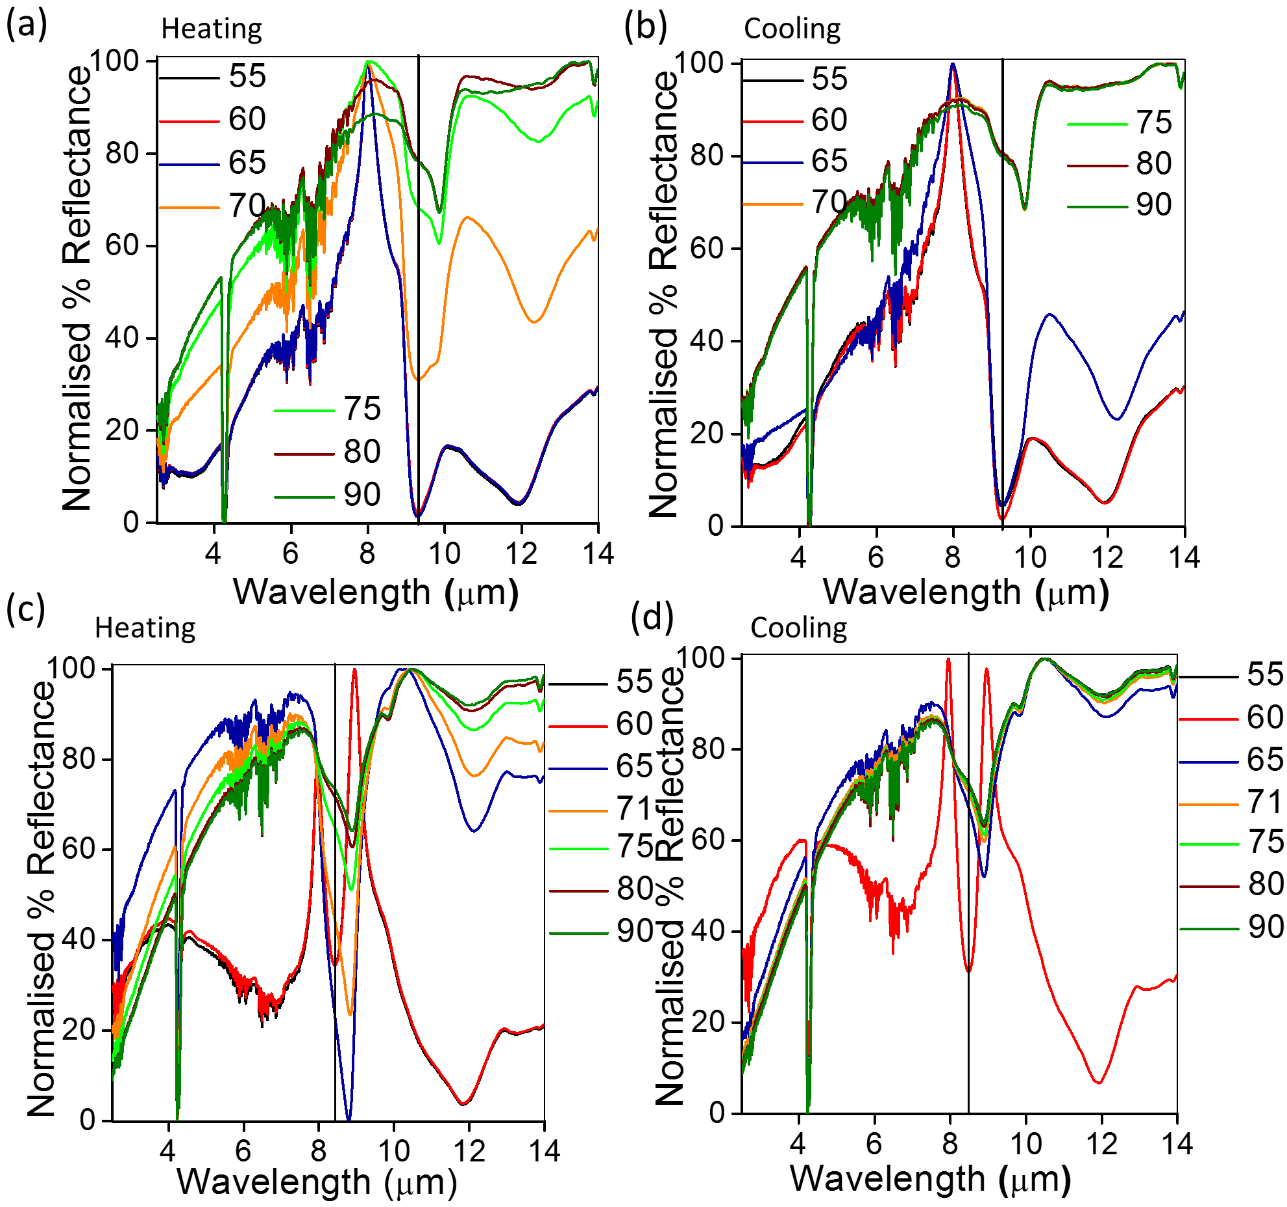


Figure S3: Reflectance spectra (a) heating; (b) cooling for RTV thin film; Reflectance spectra (c) heating; (d) cooling for RTVS2.0 thin film

Table S1: Raman modes of (a) V2O5 and (b) VO2 thin films compared with the literature.

| **Modes** | **V2O5** | | **Modes** | **VO2** | |
| --- | --- | --- | --- | --- | --- |
| **Present Work** | **Ref.1** | **Present Work** | **Ref.2** |
| Ag | **98.6** | 97 | B1g | **130** | 139 |
| B3g | **139** | 139 | Ag | **138** | 136 |
| Ag | **191** | 200 | Ag | **221** | 223 |
| B1g | **280** | 283 | Ag | **256** | 260 |
| B2g | **298.8** | 310 | Ag | **302** | 308 |
| Ag | **399.9** | 406 | Ag | **335** | 338 |
| Ag | **476.6** | 480 | Ag | **384** | 386 |
| Ag | **523.4** | 526 | Ag | **437** | 437 |
| B3g | **695.8** | 701 | Eg | **-** | 441 |
| Ag | **989** | 1000 | Ag | **493** | 500 |
|  |  |  | A1g | **611** | 616 |
|  |  |  | B2g | **813** | 825 |

**Reference:**

1. Zhou, B.; He, D. Raman spectrum of vanadium pentoxide from density-functional perturbation theory. *J. Raman Spectrosc.* **2008**, *39*, 1475–1481.
2. Wu, J. M.; Liou, L. B. Room temperature photo-induced phase transitions of VO2 nanodevices. *J. Mater. Chem.* **2011**, *21*, 5499–5504.
